# Supplementary material for: A Hybrid RSM-ANN-GA Approach on Optimization of Ultrasound-Assisted Extraction Conditions for Bioactive Component-Rich Stevia rebaudiana (Bertoni) Leaves Extract
Source: MDPI journal article supplement (doi:10.3390/foods11060883), 2022-03-20
Supplement: s1 [file s1]

# Supplementary Material

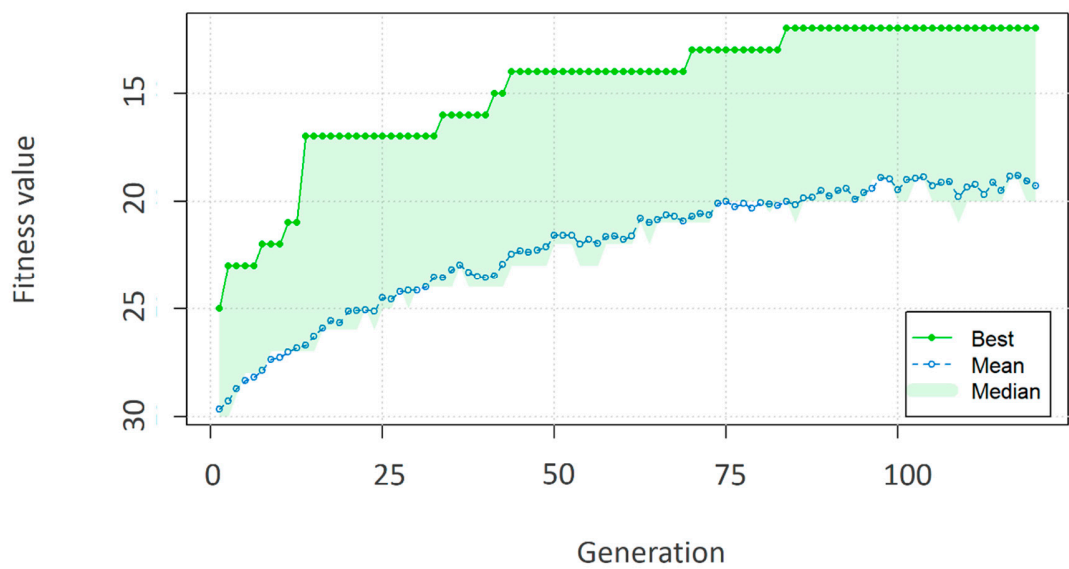

Figure S1. Fitness Value Vs generation plot for genetic algorithm.

Table S1. Setting parameters of genetic algorithm used in the optimization of process

| Setting parameters             | Values                                             |
|--------------------------------|----------------------------------------------------|
| Population size                | 50                                                 |
| Crossover function             | Constraint dependent                               |
| Mutation function              | Constraint dependent                               |
| Plot function                  | Best fitness                                       |
| Migration                      | Direction (forward), fraction (0.2), Interval (20) |
| Scaling function               | Rank                                               |
| Selection function             | Stochastic uniform                                 |
| Elite count                    | 0.05* population size                              |
| Nonlinear constraint algorithm | Augmented Lagrangian                               |

Table S2. Eigenanalysis of the Correlation Matrix from Principal Component Analysis

| <b>Principal Component Analysis:</b>           |        |        |        |        |        |        |        |        |        |        |       |
|------------------------------------------------|--------|--------|--------|--------|--------|--------|--------|--------|--------|--------|-------|
| <b>Eigenanalysis of the Correlation Matrix</b> |        |        |        |        |        |        |        |        |        |        |       |
| Eigenvalue                                     | 10.201 | 4.582  | 1.323  | 0.327  | 0.266  | 0.183  | 0.058  | 0.025  | 0.018  | 0.009  | 0.004 |
| Proportion                                     | 0.600  | 0.270  | 0.078  | 0.019  | 0.016  | 0.011  | 0.003  | 0.001  | 0.001  | 0.001  | 0.000 |
| Cumulative                                     | 0.600  | 0.870  | 0.947  | 0.967  | 0.982  | 0.993  | 0.996  | 0.998  | 0.999  | 0.999  | 1.000 |
| Variable                                       | PC1    | PC2    | PC3    | PC4    | PC5    | PC6    | PC7    | PC8    | PC9    | PC10   |       |
| R1                                             | -0.167 | -0.342 | 0.308  | -0.045 | -0.290 | -0.381 | 0.198  | -0.113 | -0.228 | -0.536 |       |
| R2                                             | 0.199  | -0.315 | -0.228 | -0.251 | -0.370 | -0.183 | 0.363  | -0.064 | -0.115 | 0.216  |       |
| R3                                             | -0.297 | -0.015 | -0.154 | 0.045  | -0.469 | -0.035 | -0.258 | -0.288 | 0.386  | -0.083 |       |
| R4                                             | 0.192  | -0.285 | -0.267 | 0.473  | 0.168  | -0.627 | -0.196 | 0.228  | 0.198  | 0.085  |       |
| R5                                             | 0.290  | -0.159 | -0.109 | 0.018  | 0.014  | 0.004  | 0.169  | -0.422 | -0.045 | 0.465  |       |
| R6                                             | -0.153 | -0.188 | 0.654  | 0.241  | -0.135 | 0.074  | 0.294  | 0.189  | 0.276  | 0.426  |       |
| R7                                             | -0.041 | 0.445  | -0.022 | 0.338  | -0.335 | -0.104 | 0.004  | -0.382 | 0.193  | 0.063  |       |
| R8                                             | 0.061  | -0.424 | -0.058 | 0.463  | -0.181 | 0.522  | -0.248 | 0.124  | -0.091 | -0.134 |       |
| R9                                             | -0.041 | 0.446  | -0.024 | 0.354  | -0.260 | -0.146 | 0.150  | 0.315  | -0.551 | 0.109  |       |
| R10                                            | 0.298  | -0.087 | -0.089 | 0.290  | -0.065 | 0.258  | 0.186  | -0.269 | -0.226 | -0.183 |       |
| R11                                            | 0.285  | 0.092  | -0.232 | -0.186 | -0.376 | 0.141  | 0.189  | 0.480  | 0.336  | -0.133 |       |
| R12                                            | 0.294  | 0.132  | 0.130  | 0.092  | 0.128  | -0.088 | 0.190  | -0.061 | 0.195  | -0.305 |       |
| R13                                            | 0.300  | 0.108  | 0.132  | 0.047  | 0.045  | 0.023  | 0.101  | -0.051 | 0.160  | -0.136 |       |
| R14                                            | 0.299  | 0.083  | 0.174  | -0.092 | -0.216 | -0.019 | -0.189 | 0.194  | 0.104  | 0.012  |       |
| R15                                            | 0.299  | 0.111  | 0.130  | 0.084  | 0.118  | 0.039  | 0.135  | -0.130 | 0.103  | -0.174 |       |
| R16                                            | 0.281  | 0.028  | 0.367  | -0.028 | 0.007  | -0.132 | -0.333 | -0.095 | -0.036 | -0.021 |       |
| R17                                            | 0.297  | -0.006 | 0.191  | -0.227 | -0.275 | -0.053 | -0.494 | -0.032 | -0.262 | 0.166  |       |
